# Supplementary material
Source: Springer Nature journal article supplement (https://www.springermedizin.de/resource/supplementary/13063_2011_954_MOESM1_ESM.pdf/9619220)
Supplement: MOESM1 [file 9619220]

**Enrollment**

Office employees in six companies (n=10 000)  
21 clusters identified  
1270 employees considered for eligibility

Declined to participate 503

**Allocation**

7 clusters  
randomized to IR1

7 clusters  
randomized to IR2

7 clusters  
randomized to control arm

Allocated to intervention (n=257)

Allocated to intervention (n=202)

Allocated to intervention (n=224)

**Follow-Up**

Lost to follow-up (n=56)  
New recruits (n=44)

**Follow-Up**

Lost to follow-up (n=57)  
New recruits (n=46)

**Follow-Up**

Lost to follow-up (n=50)  
New recruits (n=16)

**Analysis**

Weekly reports (n=15014)

**Analysis**

Weekly reports (n=11986)

**Analysis**

Weekly reports (n=11644)

INFECTION EPISODES 1451  
SICK LEAVE EPISODES 625  
ABSENCE EPISODES 726

INFECTION EPISODES 1288  
SICK LEAVE EPISODES 418  
ABSENCE EPISODES 540

INFECTION EPISODES 1214  
SICK LEAVE EPISODES 405  
ABSENCE EPISODES 484
